# Supplementary material for: Rational Design of Potent α-Conotoxin PeIA Analogues with Non-Natural Amino Acids for the Inhibition of Human α9α10 Nicotinic Acetylcholine Receptors
Source: MDPI journal article supplement (doi:10.3390/md22030110), 2024-02-27
Supplement: s1 [file s1]

# Rational Design of Potent $\alpha$ -Conotoxin PeIA Analogues with Non-Natural Amino Acids for the Inhibition of Human $\alpha 9\alpha 10$ Nicotinic Acetylcholine Receptors

Tianmiao Li <sup>1,2,†</sup>, Han-Shen Tae <sup>3,†</sup>, Jiazhen Liang <sup>1,2</sup>, Zixuan Zhang <sup>1,2</sup>, Xiao Li <sup>1,2</sup>, Tao Jiang <sup>1,2</sup>,  
David J. Adams <sup>3,\*</sup> and Riley Yu <sup>1,2,4,\*</sup>

- <sup>1</sup> Key Laboratory of Marine Drugs, Chinese Ministry of Education, School of Medicine and Pharmacy, Ocean University of China, 5 Yushan Road, Qingdao 266003, China; litianmiao99@163.com (T.L.); 17863973220@163.com (J.L.); zzzx7212@stu.ouc.edu.cn (Z.Z.); 17854203983@163.com (X.L.); jiangtao@ouc.edu.cn (T.J.)
- <sup>2</sup> Laboratory for Marine Drugs and Bioproducts, Qingdao National Laboratory for Marine Science and Technology, Qingdao 266003, China
- <sup>3</sup> Molecular Horizons, Faculty of Science, Medicine and Health, University of Wollongong, Wollongong, NSW 2522, Australia; hstae@uow.edu.au
- <sup>4</sup> Innovation Center for Marine Drug Screening & Evaluation, Qingdao National Laboratory for Marine Science and Technology, Qingdao 266003, China
- \* Correspondence: djadams@uow.edu.au (D.J.A.); ryu@ouc.edu.cn (R.Y.)
- <sup>†</sup> These authors contributed equally to this work.

**Table S1.** Pairwise interactions between PeIA (left) and PeIA[S4Dap, S9Dap] (right) at  $\alpha 9(+)\alpha 9(-)$  binding sites of  $h\alpha 9\alpha 10$  nAChR.

| PeIA residue | $\alpha 9(+)\alpha 9(-)$ |               | $\alpha 9(+)\alpha 9(-)$ |                  | PeIA[S4Dap,S9Dap] residue |
|--------------|--------------------------|---------------|--------------------------|------------------|---------------------------|
|              | $\alpha 9(+)$            | $\alpha 9(-)$ | $\alpha 9(+)$            | $\alpha 9(-)$    |                           |
| S4           |                          | D169          |                          | D166, S168, D169 | Dap4                      |
| P6           | W149                     |               | W149                     |                  | P6                        |
| S9           |                          |               |                          | Q34              | Dap9                      |
| N11          |                          |               | N154                     |                  | N11                       |
| H12          | Y197                     |               | Y197                     |                  | H12                       |
| P13          |                          | I59, L115     |                          | I59, L115        | P13                       |
| E14          |                          | <b>R111</b>   |                          | <b>R111</b>      | E14                       |

Contacts between  $h\alpha 9\alpha 10$  nAChR and PeIA/PeIA[S4Dap, S9Dap] are defined as van der Waals interactions if the distance between heavy atoms of them is between 2 and 4 Å. The electronic interactions are in bold.

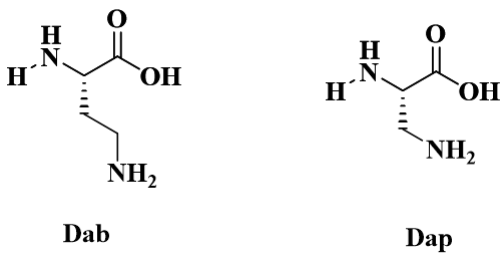

**Figure S1.** The structures of amino acids Dab-OH and Dap-OH. The non-proteinogenic amino acids Dab-OH and Dap-OH contain the same two and one methylene chain, respectively.

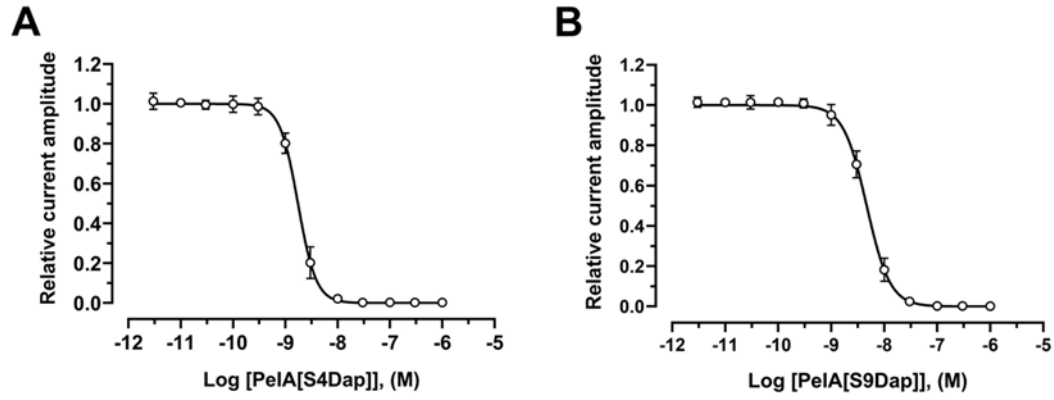

**Figure S2.** Concentration–response relationships of relative ACh-evoked current amplitude (mean  $\pm$  SD,  $n = 7$ ) mediated by  $\text{h}\alpha 9\alpha 10$  nAChRs in the presence of (A) PeIA[S4Dap] and (B) PeIA[S9Dap] giving  $\text{IC}_{50}$ 's of 1.74 nM (1.67 – 1.82; 95% CI) and 4.67 nM (4.45 – 4.90; 95% CI), respectively. Whole-cell currents at  $\text{h}\alpha 9\alpha 10$  were activated by 6  $\mu\text{M}$  ACh.

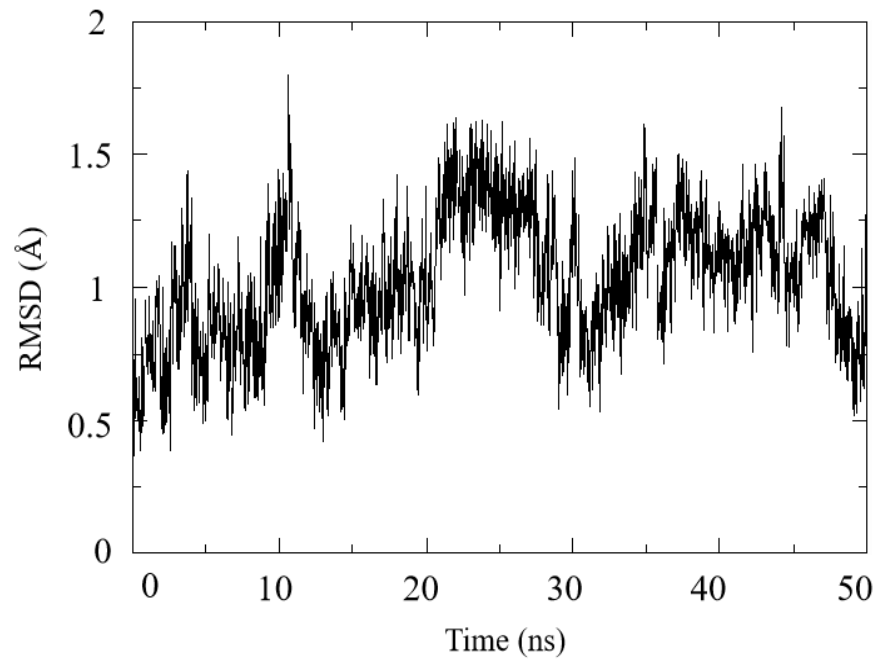

**Figure S3.** Evolution of root mean square deviation (RMSD) of PeIA.

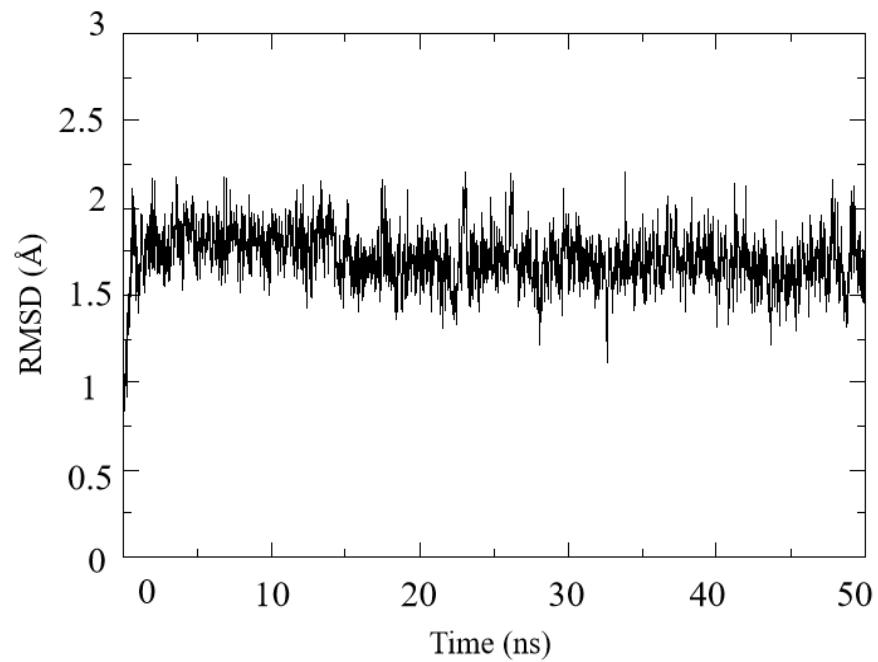

**Figure S4.** Evolution of root mean square deviation (RMSD) of PeIA[S4Dap, S9Dap].

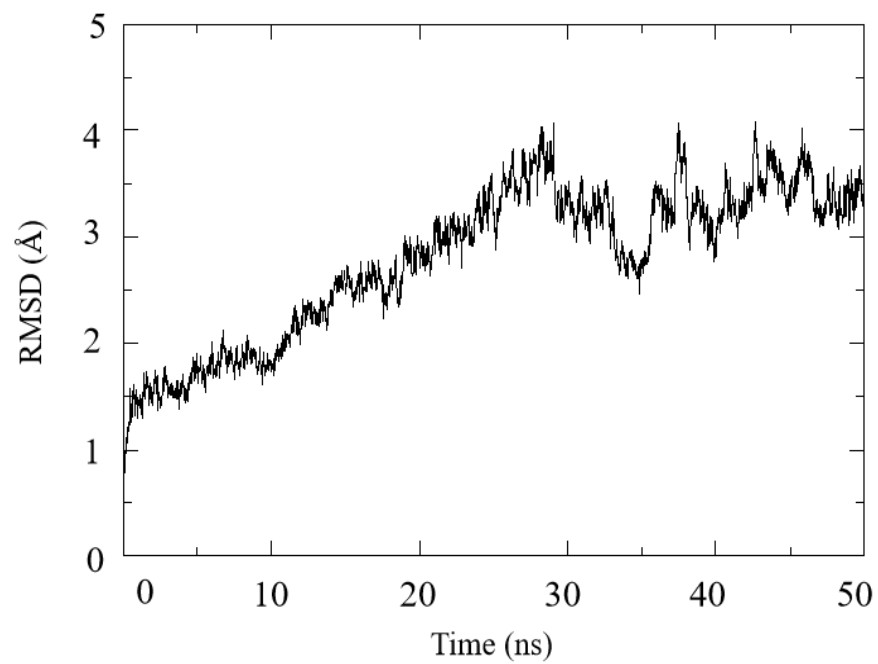

**Figure S5.** Evolution of root mean square deviation (RMSD) of PeIA bound to h $\alpha$ 9 $\alpha$ 10 nAChR.

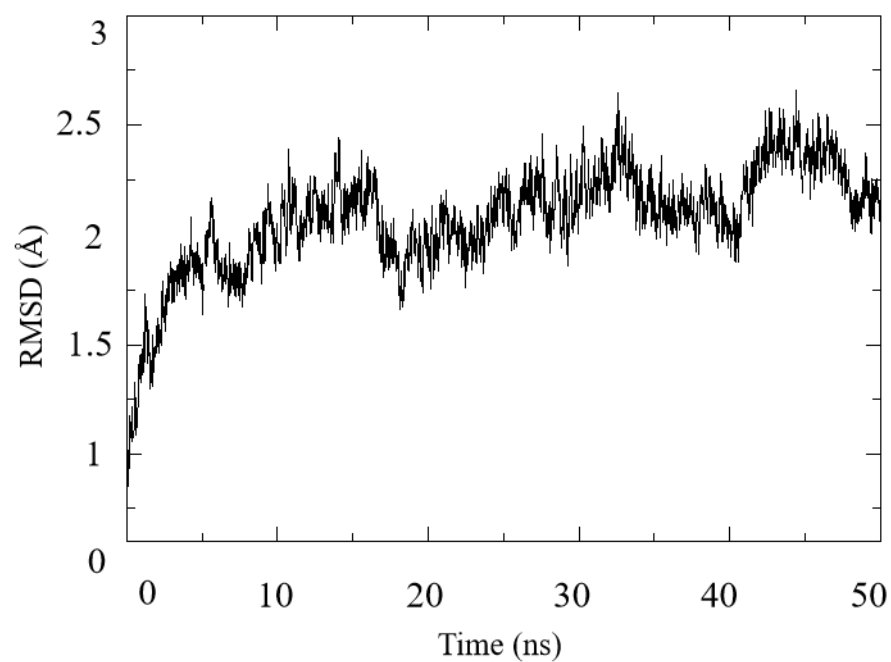

**Figure S6.** Evolution of root mean square deviation (RMSD) of PeIA[S4Dap, S9Dap] bound to hα9α10 nAChR.

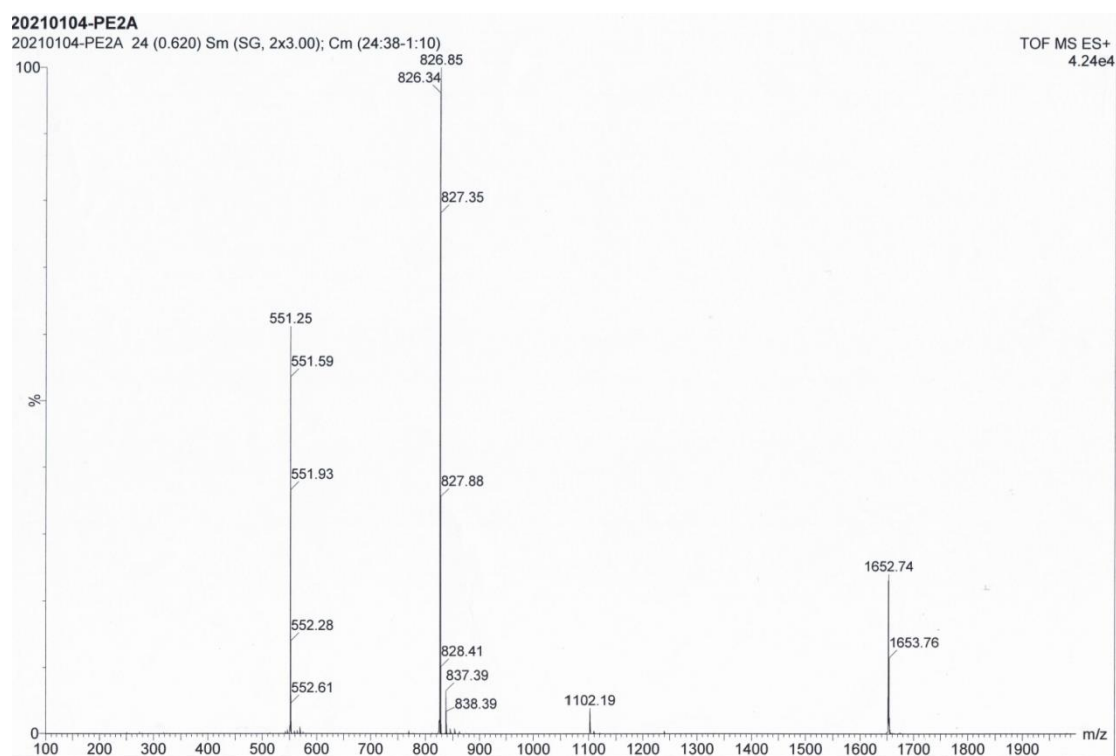

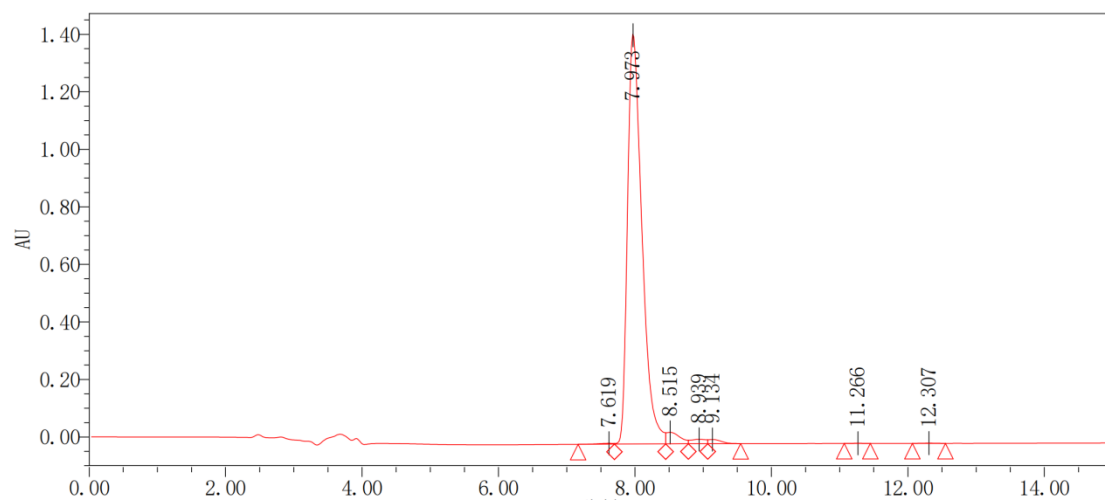

**Figure S7.** The ESI-MS and RP-HPLC of PeIA with a purity of 95.36%.

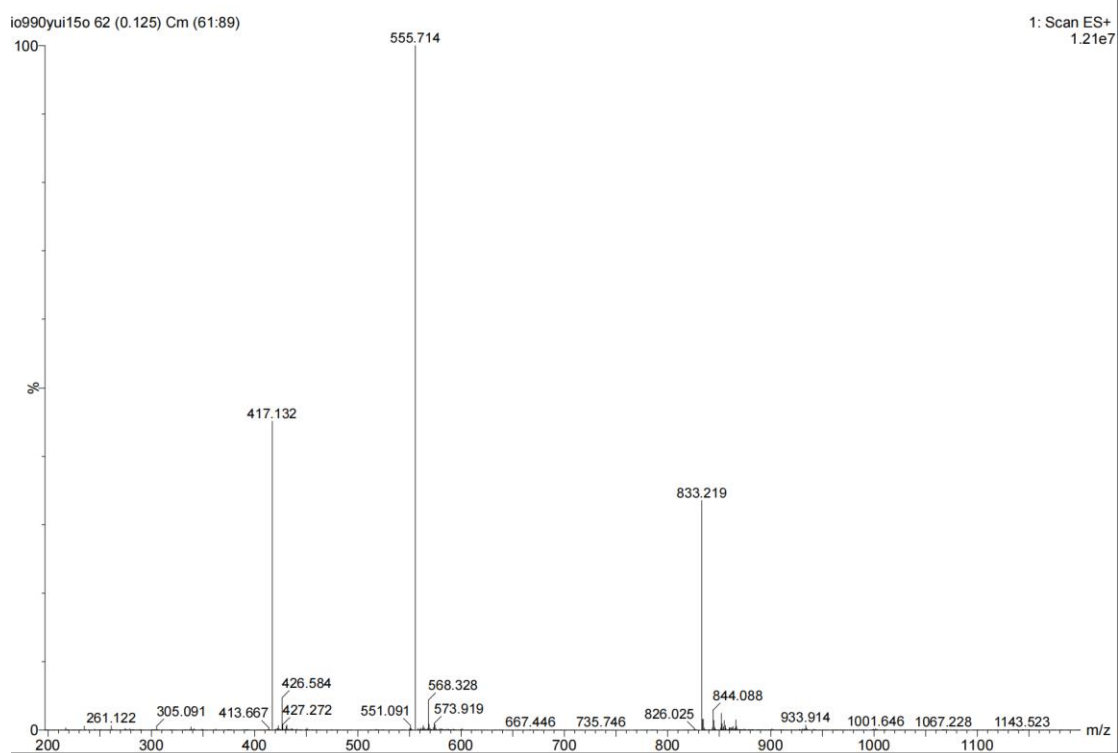

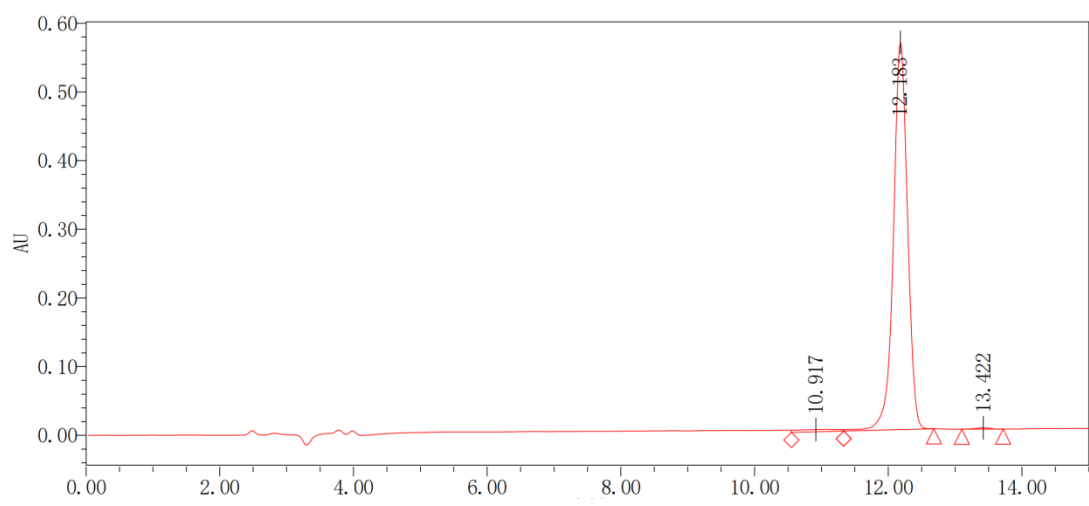

**Figure S8.** The ESI-MS and RP-HPLC of PeIA[S4Dab] with a purity of 99.67%.

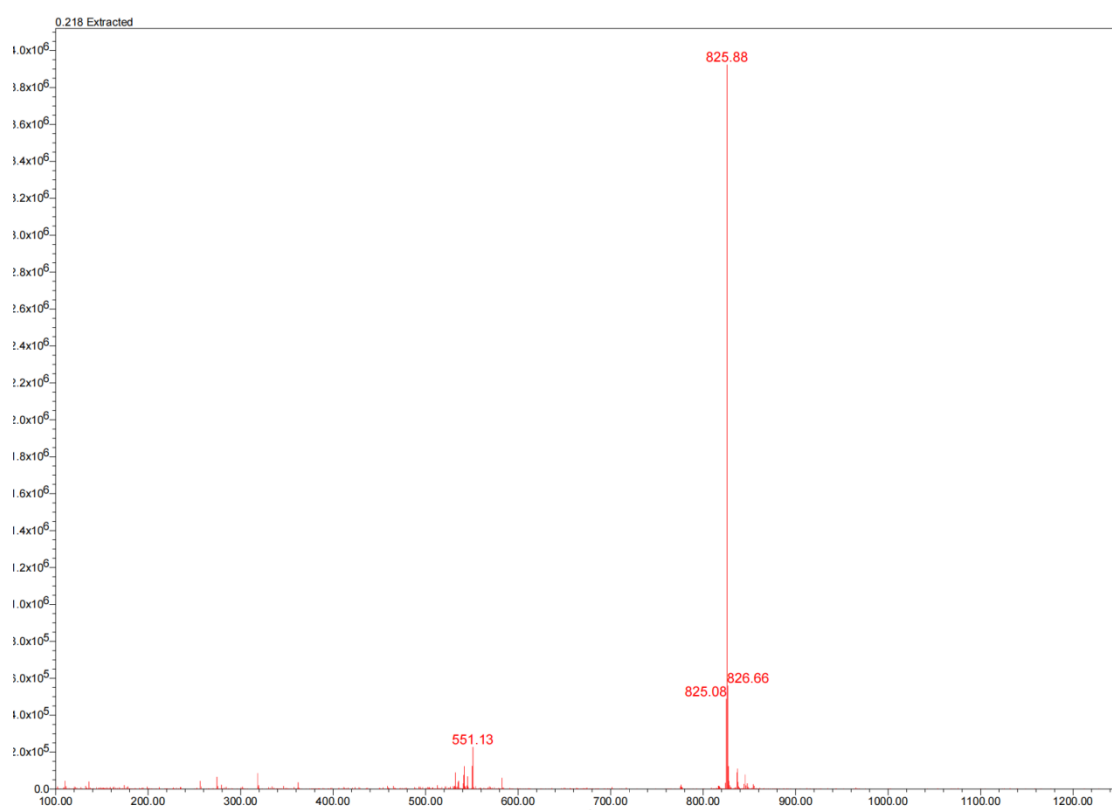

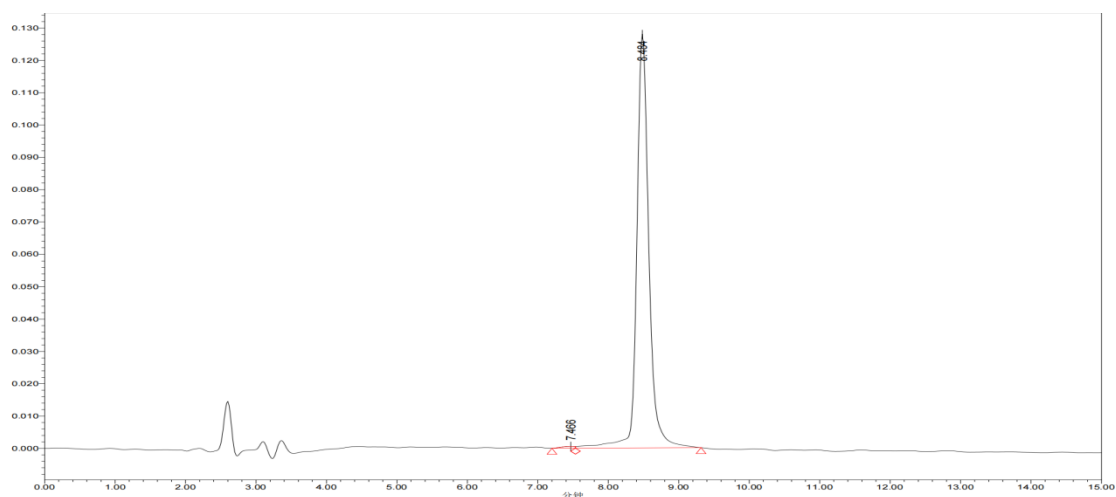

**Figure S9.** The ESI-MS and RP-HPLC of PeIA[S4Dap] with a purity of 99.53%.

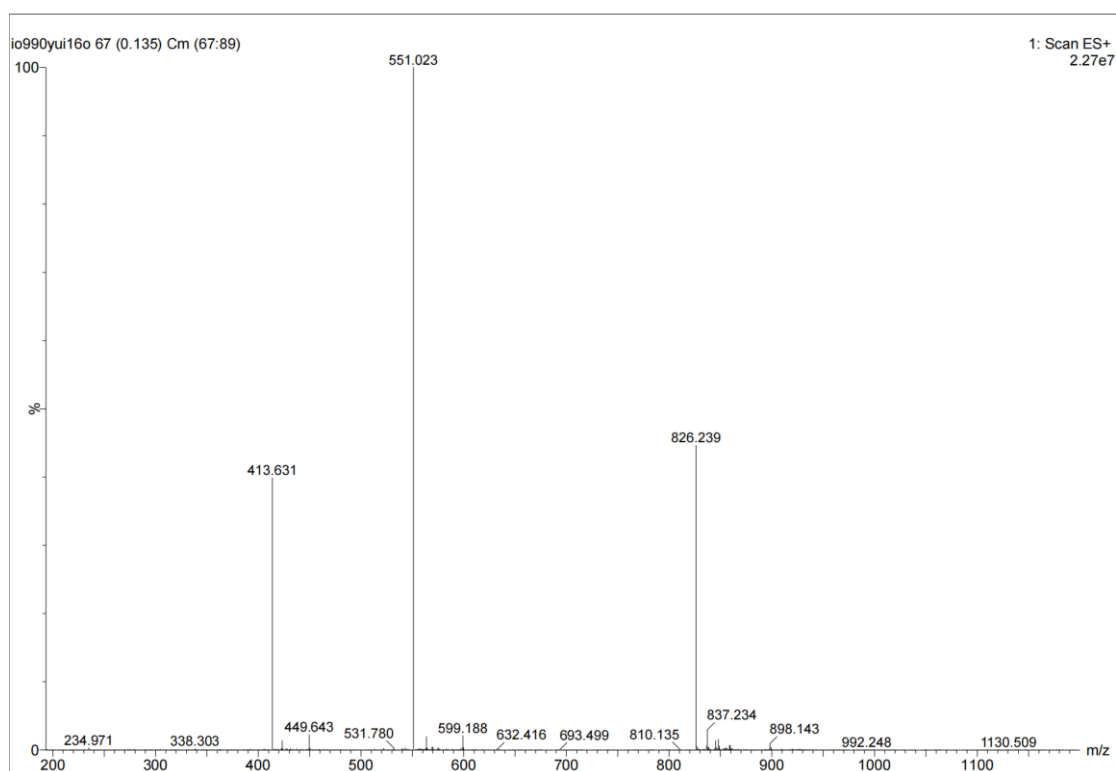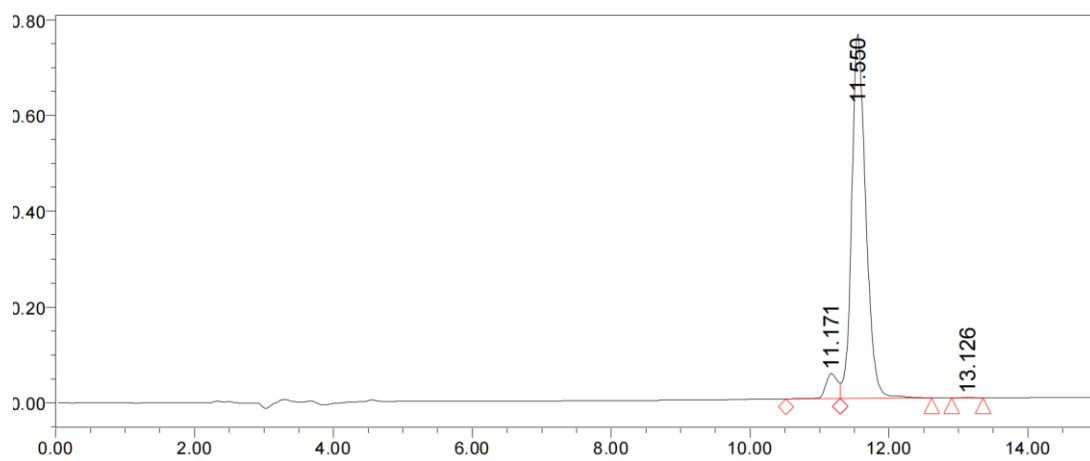

**Figure S10.** The ESI-MS and RP-HPLC of PeIA[S9Dap] with a purity of 94.68%.

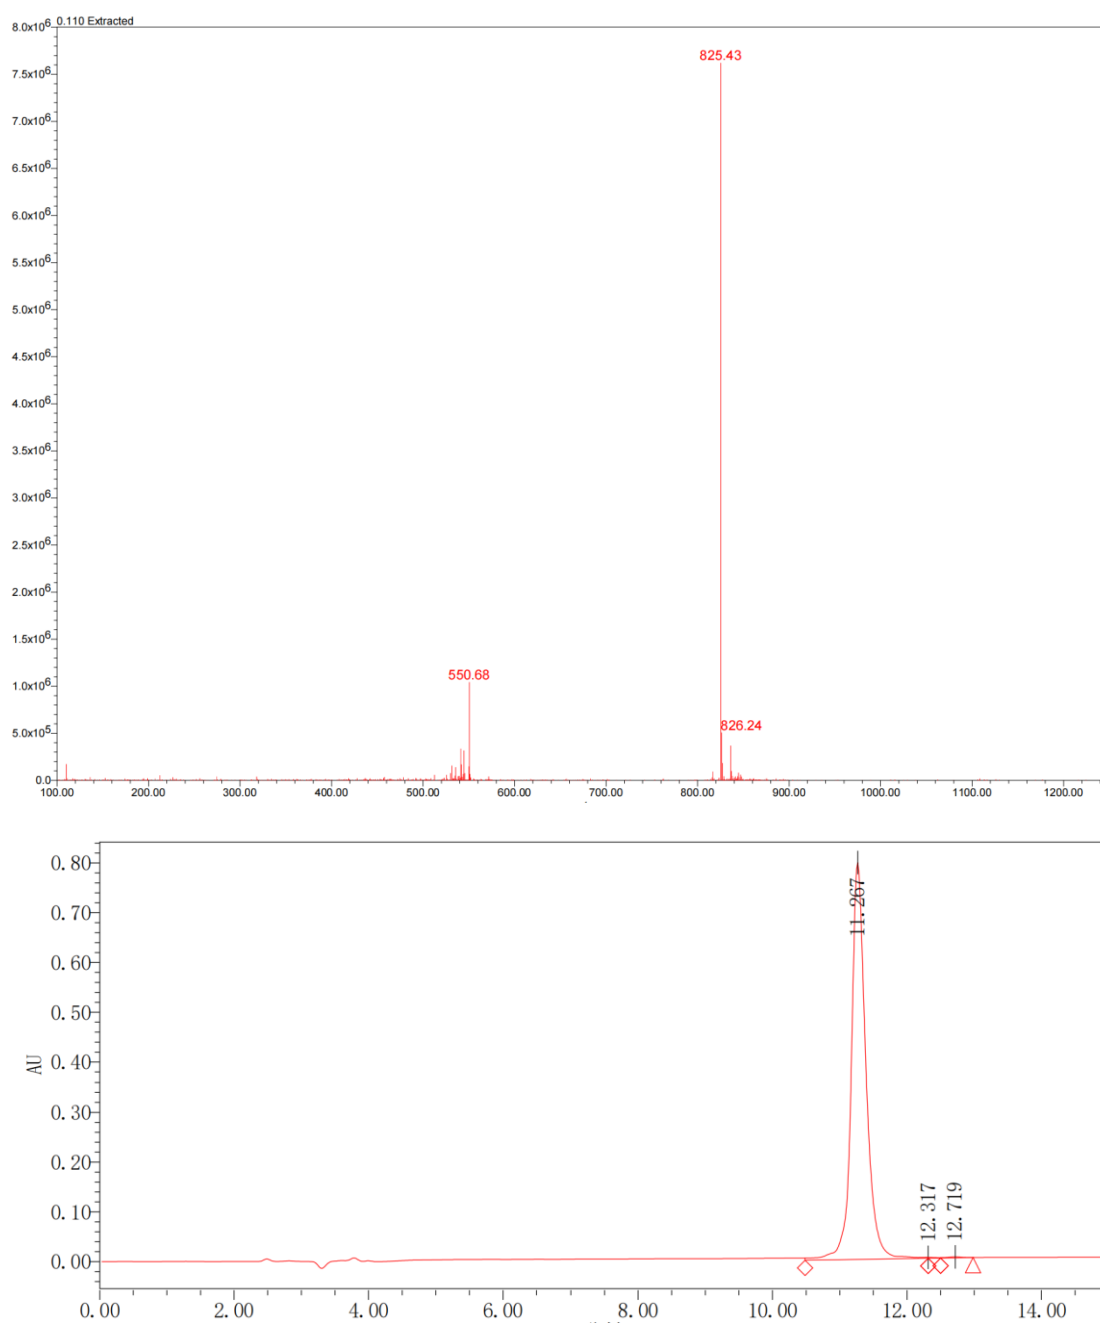

**Figure S11.** The ESI-MS and RP-HPLC of PeIA[S4Dap, S9Dap] with a purity of 99.28%.
